# Supplementary material for: Novel cyclic azobenzene-containing vesicles: photo/reductant responsiveness and potential applications in colon disease treatment
Source: Royal Society of Chemistry journal article supplement (doi:10.1039/c6ra12751g), 2016-01-01
Supplement: c6ra12751g1.pdf [file c6ra12751g1.pdf]

## Supporting Information to

# Novel Cyclic Azobenzene-Containing Vesicles: Photo/Reductant Responsiveness and Potential Application in Colon Disease Treatment

Jinjie Lu, Feng Zhou, Lishan Li, Zhengbiao Zhang, Fenghua Meng, Nianchen Zhou\* and Xiulin Zhu\*

State and Local Joint Engineering Laboratory for Novel Functional Polymeric Materials; Jiangsu Key Laboratory of Advanced Functional Polymer Design and Application; College of Chemistry, Chemical Engineering and Materials Science, Soochow University, Suzhou, 215123, P. R. China. E-mail: xlzhu@suda.edu.cn; nczhou@suda.edu.cn.

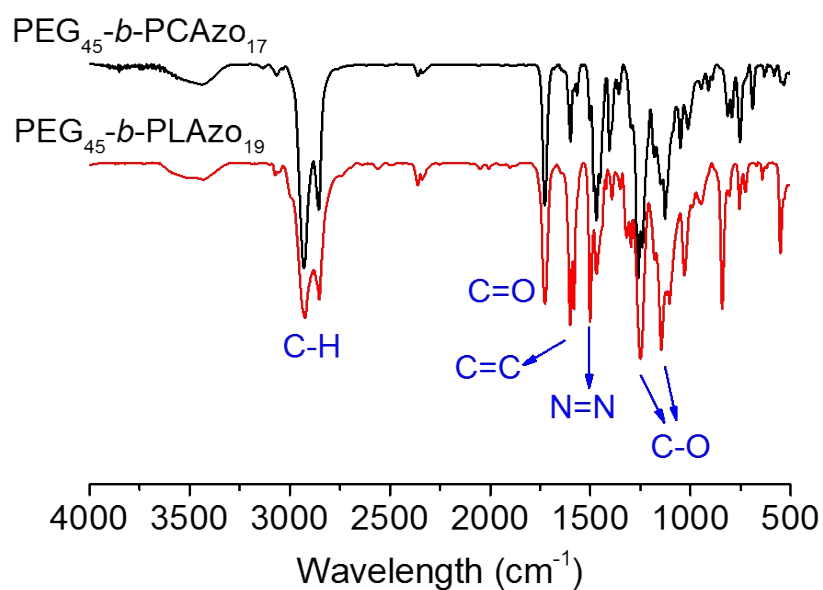

**Figure S1** FT-IR spectra of PEG<sub>45</sub>-b-PCAzo<sub>17</sub> and PEG<sub>45</sub>-b-PLAzo<sub>19</sub>.

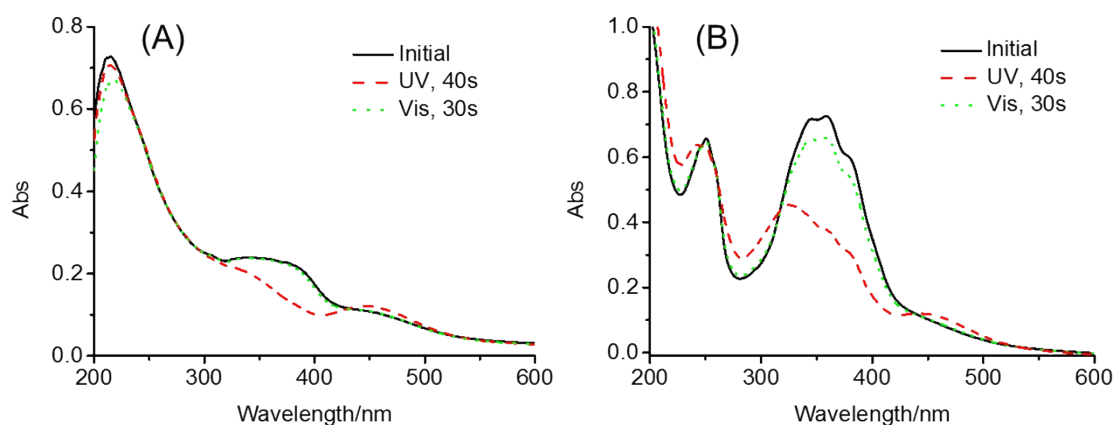

**Figure S2** UV-Vis absorption spectra of the vesicles formed by PEG<sub>45</sub>-b-PCAzo<sub>17</sub> (A) and PEG<sub>45</sub>-b-PLAzo<sub>19</sub> (B) in PB solution (pH = 7.4) under 365 nm UV light irradiation (1.4 mW/cm<sup>2</sup>) and 435 nm visible light irradiation (0.8 mW/cm<sup>2</sup>) until the photo-stationary states were achieved.

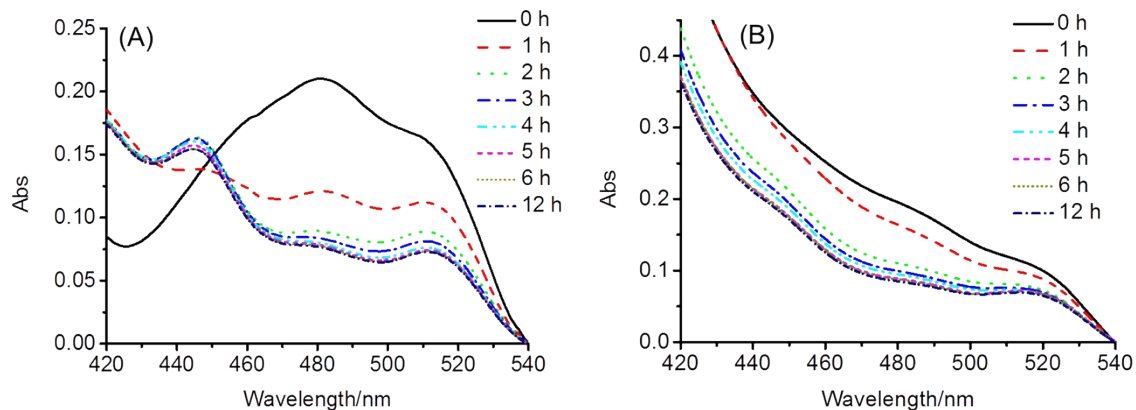

**Figure S3** UV/Vis spectra of DOX encapsulated in vesicles of PEG<sub>45</sub>-b-PCAzo<sub>17</sub> (A) and PEG<sub>45</sub>-b-PLAzo<sub>19</sub> (B) in the presence of Na<sub>2</sub>S<sub>2</sub>O<sub>4</sub> at different moment.
